# Supplementary material
Source: publisher figshare collection journal article supplement (https://acs.figshare.com/ndownloader/files/4679311)
Supplement: Supplementary file 1 [file 4679311]

**Role of Locked Nucleic Acid (LNA) modified complementary strand on Quadruplex-WC duplex equilibrium**

Niti Kumar and Souvik Maiti

Proteomics and Structural Biology Unit, Institute of Genomics and Integrative Biology, CSIR, Mall Road, New Delhi 110 007, India
Phone +91-11-27666156, Fax: +91-11-27667471

E-mail: [souvik@igib.res.in](mailto:souvik@igib.res.in)

SI Figure 1: UV annealing profile obtained for duplex formation for G-rich (1 µM) and C-rich (10 µM) strand and was monitored at 260 nm in 50 mM MES buffer pH 7, 100 mM KCl.

SI Figure 2: Sensorgrams obtained upon hybridization of 30 mer 5- biotinylated telomeric quadruplex-K+ to its unmodified and LNA modified complementary strand (1.25 nM – 100 nM) in 10 mM HEPES with 100 mM KCl and 0.005% surfactant IGEPAL
